# Supplementary material
Source: HighWire-hosted journal article supplement (https://www.cfp.ca/highwire/filestream/30366/field_highwire_adjunct_files/0/Algorithm_en.pdf)
Supplement: Algorithm_en.pdf [file Algorithm_en.pdf]

# Educational management tool

## Educational management of challenging learning situations

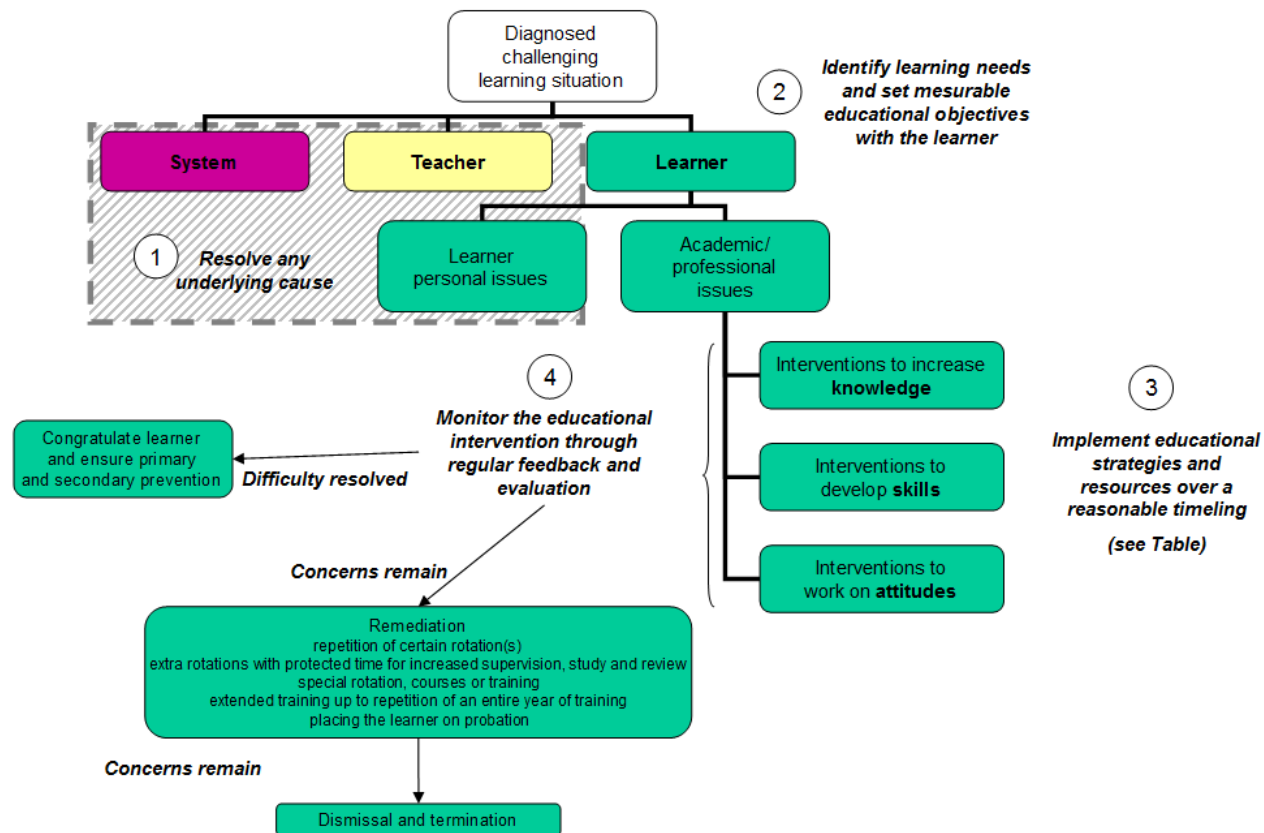

# Educational management tool

*Educational strategies and resources for each component of educational diagnosis possibilities*

| System                                                                                                                                                                                                                                                                                                                                                                                                                                                                                                                                                                                                                                                                                                                                                                                                                                                                                                                                                                                      | Teacher                                                                                                                                                                                                                                                                                                                                                                                                                                                                                                  | Learner personal issues                                                                                                                                                                                                                                                                                                                                                                                                                                                                                                                                                                                                                                                         | Knowledge                                                                                                                                                                                                                                                                                                                                                                                                                                                                                                                      | Skills                                                                                                                                                                                                                                                                                                                                                                                                                                                                                                                                                                                                                                                                                                                                                                                                                                                                    | Attitudes                                                                                                                                                                                                                                                                                                                                                                                                                                                                                                                                                                                                                                                                                                                                                                                                                                                                                                                      |
|---------------------------------------------------------------------------------------------------------------------------------------------------------------------------------------------------------------------------------------------------------------------------------------------------------------------------------------------------------------------------------------------------------------------------------------------------------------------------------------------------------------------------------------------------------------------------------------------------------------------------------------------------------------------------------------------------------------------------------------------------------------------------------------------------------------------------------------------------------------------------------------------------------------------------------------------------------------------------------------------|----------------------------------------------------------------------------------------------------------------------------------------------------------------------------------------------------------------------------------------------------------------------------------------------------------------------------------------------------------------------------------------------------------------------------------------------------------------------------------------------------------|---------------------------------------------------------------------------------------------------------------------------------------------------------------------------------------------------------------------------------------------------------------------------------------------------------------------------------------------------------------------------------------------------------------------------------------------------------------------------------------------------------------------------------------------------------------------------------------------------------------------------------------------------------------------------------|--------------------------------------------------------------------------------------------------------------------------------------------------------------------------------------------------------------------------------------------------------------------------------------------------------------------------------------------------------------------------------------------------------------------------------------------------------------------------------------------------------------------------------|---------------------------------------------------------------------------------------------------------------------------------------------------------------------------------------------------------------------------------------------------------------------------------------------------------------------------------------------------------------------------------------------------------------------------------------------------------------------------------------------------------------------------------------------------------------------------------------------------------------------------------------------------------------------------------------------------------------------------------------------------------------------------------------------------------------------------------------------------------------------------|--------------------------------------------------------------------------------------------------------------------------------------------------------------------------------------------------------------------------------------------------------------------------------------------------------------------------------------------------------------------------------------------------------------------------------------------------------------------------------------------------------------------------------------------------------------------------------------------------------------------------------------------------------------------------------------------------------------------------------------------------------------------------------------------------------------------------------------------------------------------------------------------------------------------------------|
| <p><b>Academics</b><br/>Program planning limiting the time spent in direct patient care and encouraging elaborated and contextual learning. Structured orientation session. Structured evaluation process of the curriculum and/or rotations from which comments are considered to improve the system.</p> <p><b>Conditions for learning</b><br/>Encourage mandated and personal days off. Reduce clinical workload. Limit administrative duties and "scut work". Provide adequate administrative support. When problems occur in a specific rotation, repeat the learning activity at a new site. If difficulties happened when trainees were not in home setting, bring them back to the home setting or limit away/ elective rotations.</p> <p><b>Patient care issues</b><br/>Provide opportunities for discussion, reassurance and mentoring. Gradually increase the complexity of patient's problems, responsibility for patient care and for supervision of more junior trainees.</p> | <p>Changing the primary supervisor or the location of training</p> <p>Teachers can also work on their effectiveness by adopting an appropriate teaching style specific to the learners' needs.</p> <p>Provide timely and constructive <b>feedback</b></p> <p>Creating a secure context for learning, listening to trainees and developing creative ways of delivering the curriculum will help in delivery of teaching (can be learned and practiced through <b>faculty development</b> activities).</p> | <p>Encourage learners to keep a good life balance</p> <p>Include some formal training about financial and career planning in curricula.</p> <p>Peer interaction.</p> <p>In-house or community support groups.</p> <p>Temporary decrease in workload and reassurance if time needed to focus on personal issues.</p> <p>Leave of absence when necessary.</p> <p>Refer for outside individual counselling, psychotherapy or medical intervention, including testing for learning disability.</p> <p><i>Clinical teachers should avoid becoming the learner's physician or therapist, and to refer to the appropriate professionals when a personal problem is identified.</i></p> | <p><i>Self-directed study:</i> encourage learners to read relevant textbook articles or clinical practice guidelines on <i>specific clinical situations</i> encountered during the day and plan follow-up on readings.</p> <p>Create a <i>reading list</i>.</p> <p><i>Weekly study sessions.</i></p> <p><i>Tests.</i></p> <p>Enhanced teaching and learning opportunities with <i>core content review, mini-tutorials, discussion of preassigned readings.</i></p> <p>Encourage attendance at <i>teaching conferences.</i></p> | <p><b>Role modeling</b></p> <p>Increased <b>observation and feedback</b> (direct observation, assignment of a mentor or academic advisor who will spend additional time with the learner for structured supervision, videotape review, increased indirect supervision by case discussion and chart reviews, role play sessions with a supervising faculty member).</p> <p><b>Computer programs and interactive video exercises.</b></p> <p><b>Clinical reasoning exercises</b> (make learners commit to a diagnosis or management plan, ask higher level questions that require learners to discuss alternative clinical manifestations or to change management plan).</p> <p><b>Objective structured clinical examination scenarios.</b></p> <p><b>Specific skill training</b> (assertiveness training, interviewing skills, interpersonal skills, time management).</p> | <p>Communicate clear expectations</p> <p>Peer or mentor support</p> <p><b>Positive reinforcement</b> for strengths and successes.</p> <p>Objective, nonjudgmental confrontation and feedback.</p> <p><b>Modeling</b> the desired attitude through direct faculty presence.</p> <p>Regular and frequent <b>meetings with a faculty advisor</b>, or other concerned faculty member, to focus on a better understanding of the problem and its eventual remediation.</p> <p>Teach professionalism through a multifaceted approach (didactic teaching, bedside teaching, evaluation of residents, role modeling and individualized mentorship).</p> <p><b>Strict behavioural guidelines</b> sometimes need to be set.</p> <p>Foster <b>intrinsic motivation</b><br/>Offer <b>careful career exploration</b> switch programs or specialties is foreseen.</p> <p><i>Assessment of readiness to change a behavior is crucial.</i></p> |
